# Supplementary material for: Highly Localized Enrichment of Trypanosoma brucei Parasites Using Dielectrophoresis
Source: PubMed Central journal article supplement (PMC7344920; doi:10.3390/mi11060625), 2020-06-26
Supplement: micromachines-11-00625-s001.pdf [file micromachines-11-00625-s001.pdf]

# Supplementary Materials: Highly Localized Enrichment of *Trypanosoma brucei* Parasites Using Dielectrophoresis

Devin Keck, Callie Stuart, Josie Duncan, Emily Gullette and Rodrigo Martinez-Duarte

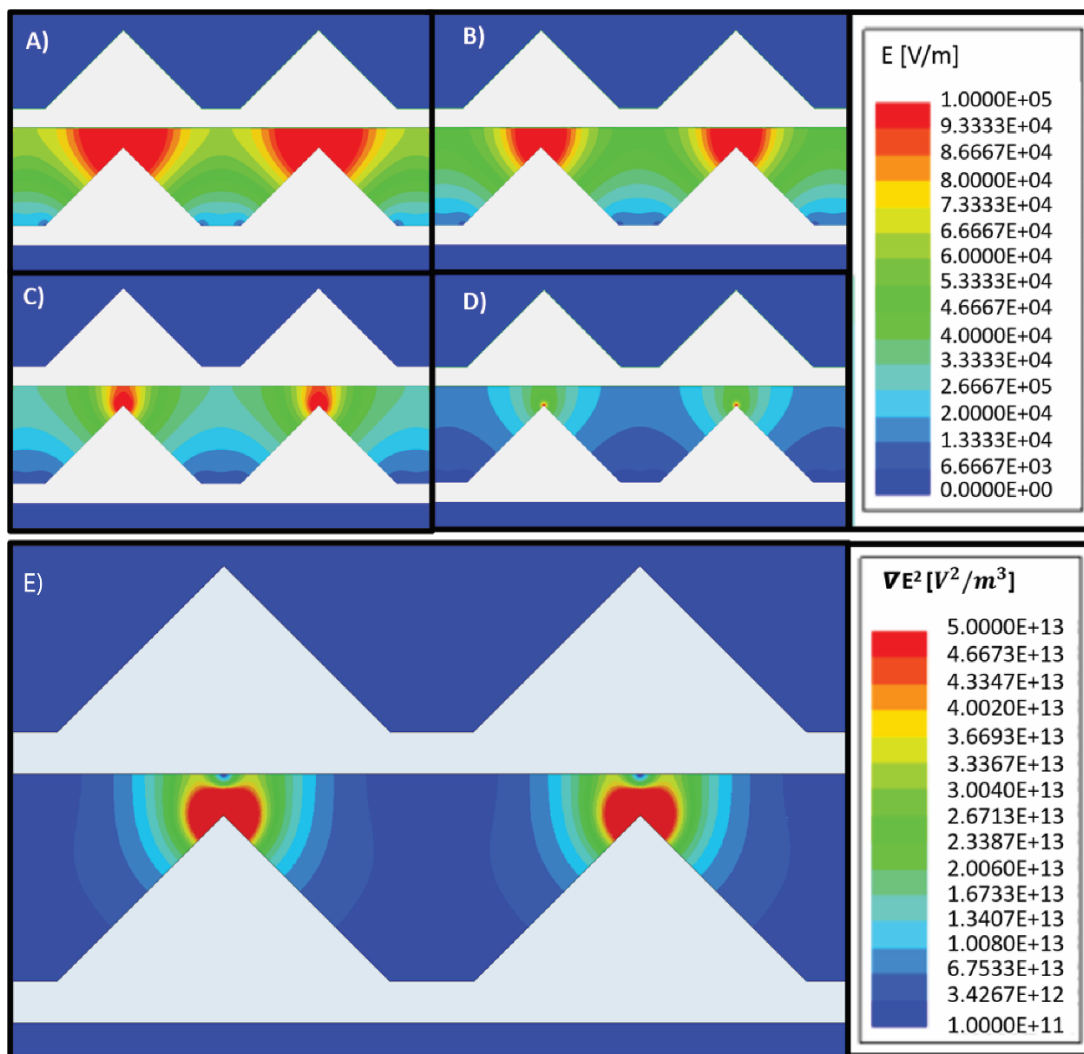

**Figure S1.** Modeling of the electric field  $E$  for an array of triangular titanium electrodes (white geometries) with the same footprint than the semi-circular electrodes presented in the main text. Electrodes are modeled to be polarized using different voltages: (A) 20 V<sub>pp</sub> (B) 15 V<sub>pp</sub> (C) 10 V<sub>pp</sub> and (D) 5 V<sub>pp</sub>. The modeled media around electrodes was water with an electrical conductivity of 504  $\mu$ S/cm. (E) Modeling of  $\nabla E^2$  in the array of triangular titanium electrodes (white geometries) when polarized using 5 V<sub>pp</sub>. The modeled media around electrodes was water with an electrical conductivity of 504  $\mu$ S/cm.
